# Supplementary material for: Arginine deprivation alters microglial polarity and synergizes with radiation to eradicate non-arginine-auxotrophic glioblastoma tumors
Source: PubMed Central journal article supplement (PMC8920336; doi:10.1172/jci142137), 2022-03-15
Supplement: jci-132-142137-s216.pdf [file jci-132-142137-s216.pdf]

## Supplementary Figures and Legends

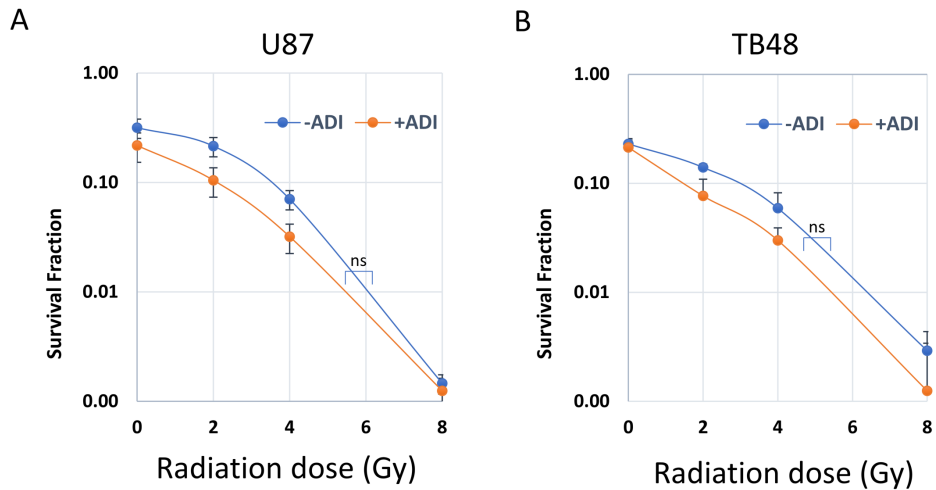

### Supplementary Figure 1 (S1): ADI-PEG20 does not potentiate the effects of radiation in 2D cultures:

Replicate plates of established and primary ASS1 positive GBM cells U87 and TB48, respectively were pre-incubated with ADI-PEG20 (1 $\mu$ g/ml) for 24h then treated with different doses of ionising radiation. After 14 days of growth, plates were fixed, stained with crystal violet and the number of surviving colonies were plotted as means  $\pm$  SD, n=12 (A-B). Statistical analysis was performed using two-way ANOVA with Bonferroni post-test using GraphPad Prism, ns- non-significant

A

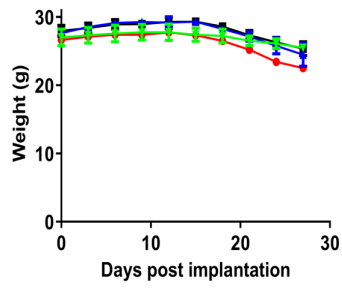

B

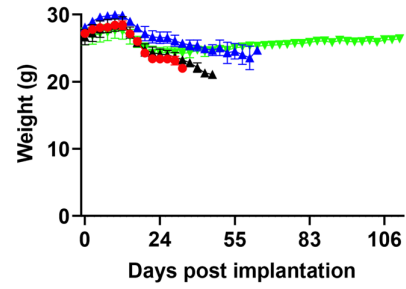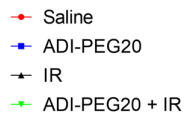

**Supplementary Figure 2 (S2): Average weight of mice with GL261 tumors (g) during the course of the study.**

A: Mice harbouring GL261-luc2 tumors harvested at day 28

B: Mice harbouring GL261-luc2 tumors, survival study

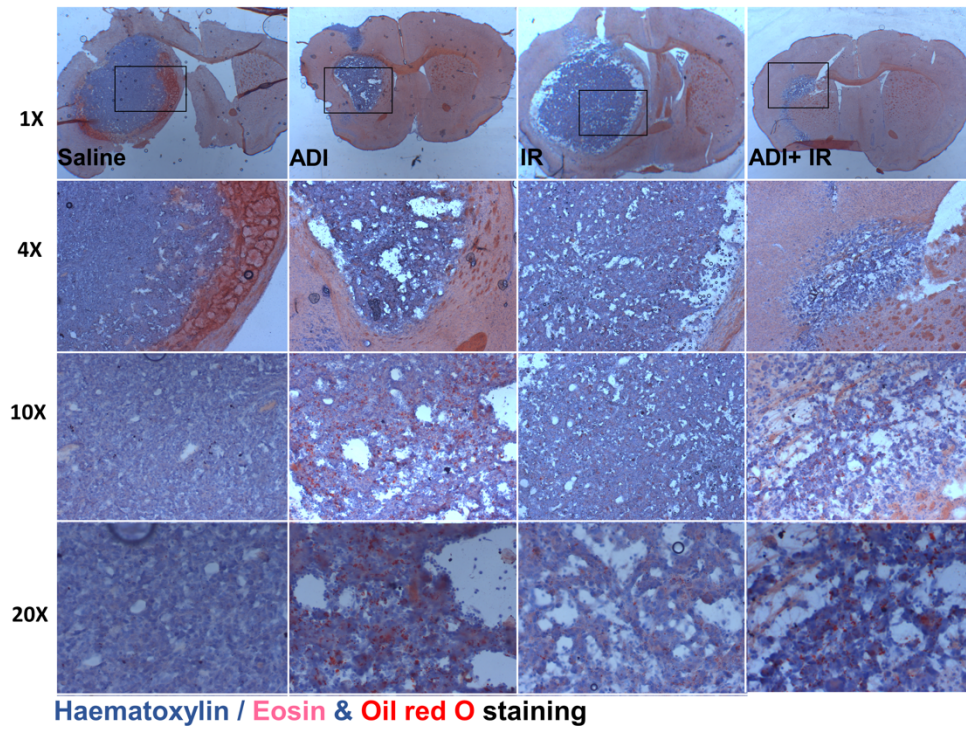

**Supplementary Figure 3 (S3): Phagocytic activity of microglia in response to arginine deprivation**

Immunohistochemical assessment of microglial phagocytic capacity by Oil red O staining of representative mice sections at different magnifications.

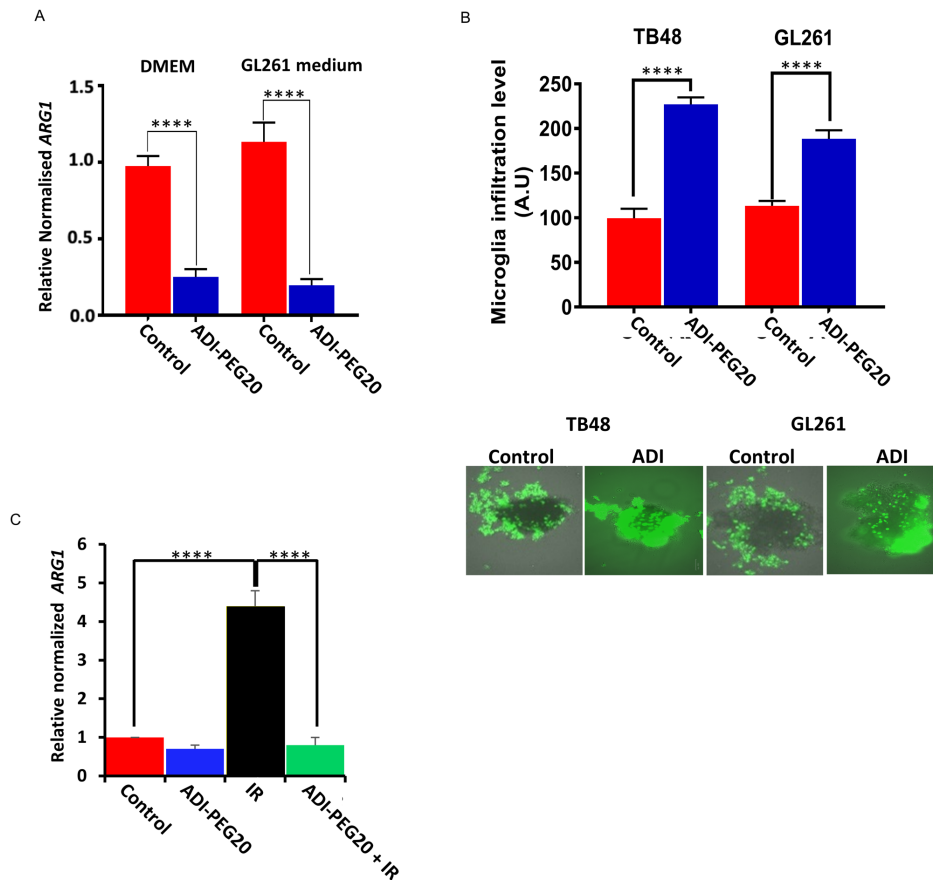

#### Supplementary Figure 4 (S4): In vitro analysis of Arg1 expression in microglia cells

In vitro assessment of microglial (BV2 cells) expression of Arg1 when cultured in fresh media or conditioned media from tumour cells (GL261) treated with ADI-PEG20 (1 $\mu$ g/ml) for 24 hours (A). Infiltration of microglia in co-cultures of GBM neurospheres (GL261 and TB48) and microglia (GFP expressing BV2 cells) treated with ADI-PEG20 for 24 hours (B). In vitro assessment of microglial (BV2 cells) expression of *Arg1* after treatment with ADI-PEG20 (100ng/ml), radiation and ADI-PEG20 + radiation (C). Results are the means  $\pm$  SEM of two experiments (n=3) analysed in triplicate using One-way ANOVA. \*  $p < 0.05$ , \*\*  $p < 0.01$ , \*\*\*  $p < 0.001$ , \*\*\*\*  $p < 0.0001$ .

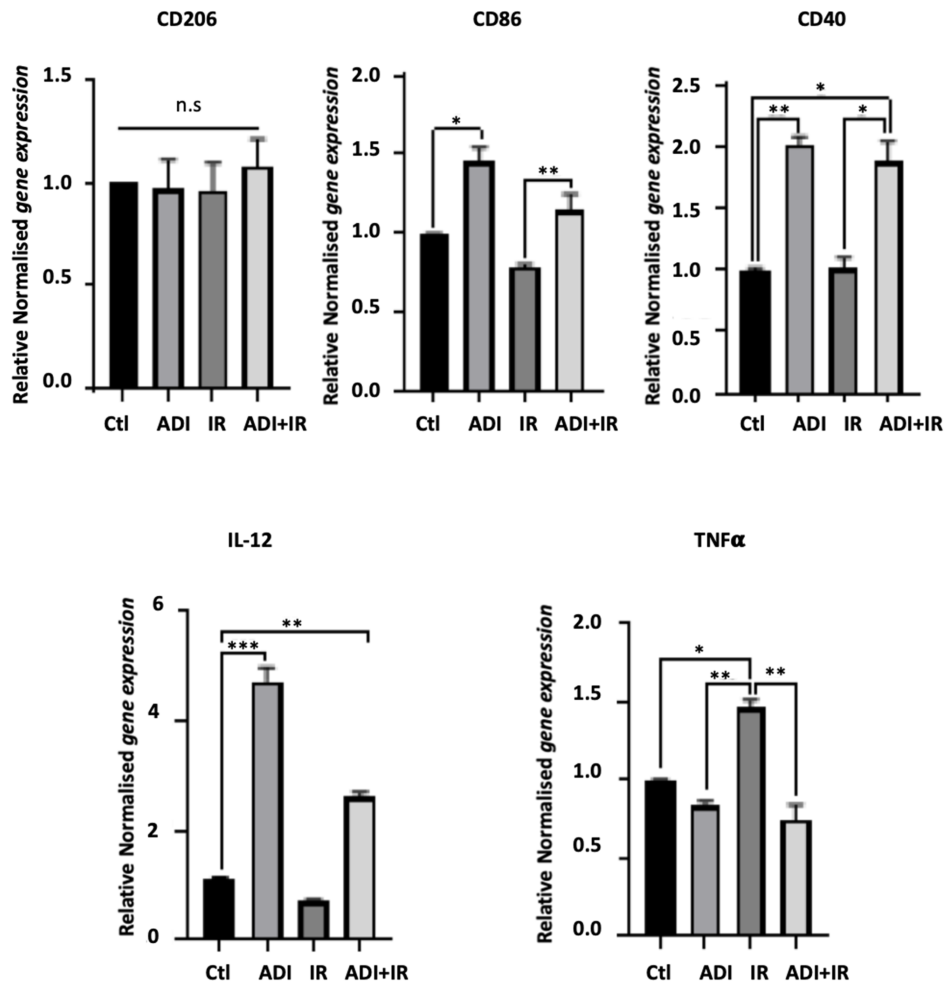

**Supplementary Figure 5 (S5): Microglia expression of pro-inflammatory markers in response to arginine deprivation in vitro.**

Relative gene expression and secretion of pro-inflammatory markers and cytokines in BV2 cells in response to ADI-PEG-20 (100ng/ml), radiation (2Gy) monotherapy and in combination (B). Data represents the mean +/- SEM (n=2) analysed using One-way ANOVA. \*  $p < 0.05$ , \*\*  $p < 0.01$ , \*\*\*  $p < 0.001$ , \*\*\*\*  $p < 0.0001$

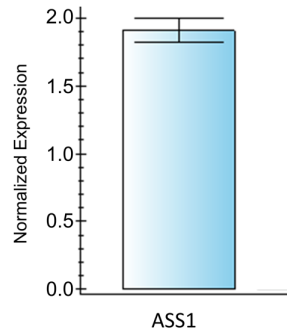

**Supplementary Figure 6 (S6): qPCR analysis of ASS1 mRNA expression in CT-2A cells**

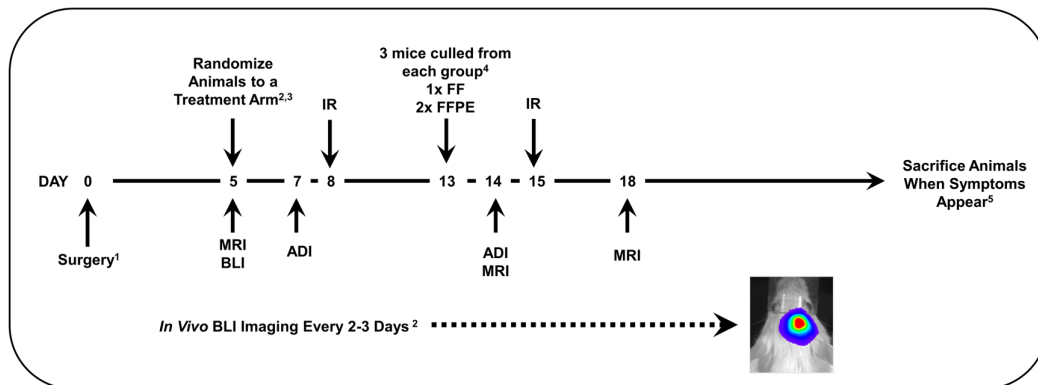

<sup>1</sup> Intracranial implantation of CT-2A-luc cells into 10 week-old C57BL/6 female albino mice (average weight 20g)

<sup>2</sup> Animals are given a subcutaneous injection of luciferin and imaged under isoflurane anesthesia on a warmed platform using the IVIS® Spectrum *in vivo* imaging system.

<sup>3</sup> Animals are randomized to a treatment arm – 10 animals per treatment arm, per experiment: ADI-PEG20 treated animals received 5IU administered via intramuscular injection every 7 days starting from day 7 after implantation. Radiation (4Gy of whole brain radiation) given 16hrs after ADI-PEG20 treatment on a weekly basis.

<sup>4</sup> FF = flash frozen; FFPE = formalin-fixed paraffin embedded

<sup>5</sup> Animals are sacrificed when a reproducible set of symptoms appear which include lethargy, failure to ambulate, anorexia resulting in >10% loss of weight.

**Supplementary Figure 7: Schematic diagram depicting the experimental protocol for in vivo experiments using CT-2A cells/tumors**

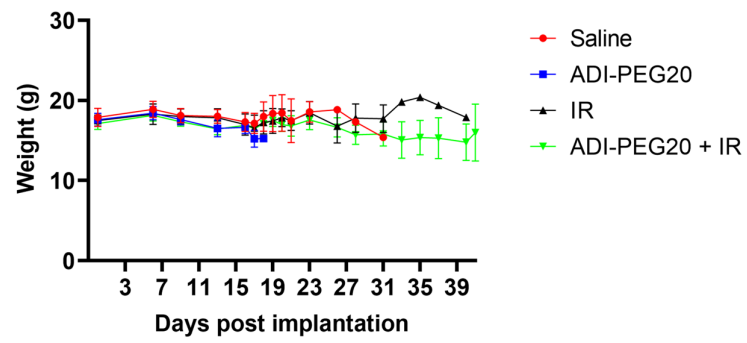

**Supplementary Figure 8: Average weight of mice harbouring CT-2A tumors during the course of the study. Vertical bars are SD.**

| Gene            | Description                                      | In TCGA | Reference                                                                                                                                        |
|-----------------|--------------------------------------------------|---------|--------------------------------------------------------------------------------------------------------------------------------------------------|
| ARG1            | Arginase 1                                       | Yes     | doi: 10.3390/jms19020436 and " Nature Reviews Immunology, vol. 5, no. 8, pp. 641–654, 2005.                                                      |
| LLGL1 (MGL1)    | LLGL Scribble Cell Polarity Complex Component 1  | Yes     | doi: 10.1016/j.smim.2015.10.003.                                                                                                                 |
| ITGB3           | Integrin subunit beta 3                          | Yes     | Cell. 1999 Feb 5;96(3):319-28. and <i>Perspect Medicin Chem.</i> 2008; 2: 57–73.                                                                 |
| TGFB1           | Transforming growth factor beta 1                | Yes     | doi: 10.1007/s10555-010-9226-3 and doi:https://doi.org/10.1016/j.cell.2008.07.001                                                                |
| CTLA4           | Checkpoints T-lymphocyte-associated protein 4    | Yes     | doi: 10.1007/s11060-015-1747-8 and doi: 10.3389/fonc.2018.00086                                                                                  |
| CCR2            | CC chemokine receptor 2                          | Yes     | <a href="https://doi.org/10.1073/pnas.1604263113">https://doi.org/10.1073/pnas.1604263113</a>                                                    |
| COL14A1         | Collagen type XIV alpha 1 chain                  | Yes     | doi: 10.1158/1541-7786.MCR-13-0236                                                                                                               |
| TREM2           | Triggering receptor expressed on myeloid cells 2 | Yes     | doi: 10.1586/1744666X.2015.1043893                                                                                                               |
| FPR1            | Formylpeptide receptor1 (FPR1)                   | Yes     | <a href="https://doi.org/10.1016/j.intimp.2012.07.015">doi: 10.1016/j.intimp.2012.07.015</a>                                                     |
| CLEC7A          | C-Type Lectin Domain Containing 7A               | Yes     | doi: 10.3389/fimmu.2018.00227 and doi: 10.1186/s12974-020-01797-2.                                                                               |
| MS4A6A (MS4A6B) | Membrane spanning 4-domains A6A                  | Yes     | <i>Neurobiol Aging.</i> 2014 Feb;35(2):279-90. doi: 10.1016/j.neurobiolaging.2013.08.002. Epub 2013 Sep 21. and doi: 10.1016/j.redox.2017.10.011 |
| CD163           | CD163 Molecule                                   | Yes     | doi: 10.1089/ars.2012.4834 and <a href="https://doi.org/10.1080/2162402X.2019.1601478">https://doi.org/10.1080/2162402X.2019.1601478</a>         |
| AQP9            | Aquaporin 9                                      | Yes     | doi: 10.3390/jms17071029 and <i>J Transl Med.</i> 2019 Nov 8;17(11):363. doi: 10.1186/s12967-019-2113-y.                                         |
| ITGAM           | Integrin subunit alpha M                         | Yes     | doi: 10.1038/nrc2748 and <i>Cell.</i> 1999 Feb 5;96(3):319-28. and doi: 10.3892/ol.2016.4626                                                     |
| IL33            | Interleukin 33                                   | Yes     | doi: 10.1007/s12079-018-0464-4                                                                                                                   |
| CHI3L1          | Chitinase 3 like 1                               | Yes     | doi: 10.1007/s12026-013-8459-y and <i>Oncogene</i> volume 31, pages3111–3123(2012)                                                               |
| CHI3L2          | Chitinase 3 like 2                               | Yes     | doi: 10.1007/s12026-013-8459-y and doi: 10.21873/anticancerres.13915 <i>Anticancer Research</i>                                                  |

**Supplementary Table 1: Microglia/macrophage pro-tumour gene list generated from published manuscripts**

| Verhaak subtype                                                                                 | Cluster       |                |
|-------------------------------------------------------------------------------------------------|---------------|----------------|
|                                                                                                 | 1             | 2              |
|  Classical   | -2.538 (8.96) | 3.091 (13.30)  |
|  Mesenchymal | 3.255 (14.74) | -3.964 (21.87) |
|  Neural      | 2.224 (6.88)  | -2.708 (10.21) |
|  Proneural   | -2.637 (9.68) | 3.212 (14.36)  |

**Supplementary Table 2: GBM subtypes are specifically associated with the pro-tumour immune signature.** Table showing the results of a Chi-Squared test between GBM subtypes and immune class. Residuals with contributions shown in brackets (%)



| PRIMARY ANTIBODY                         | COMPANY                                              |
|------------------------------------------|------------------------------------------------------|
| Mouse anti- $\alpha_v\beta_3$ (ab238667) | Abcam (Cambridge, UK)                                |
| Goat anti-CD31/PECAM-1 (AF3387)          | R&D Systems, Bio-Techne (Minneapolis, MN, USA)       |
| Rabbit anti-GFAP (RP014)                 | Diagnostic BioSystems (Pleasanton, CA, USA)          |
| Mouse anti-Iba1 (MABN92)                 | Millipore, Merck (Darmstadt, Germany)                |
| Mouse anti-3-NT (ab110282)               | Abcam (Cambridge, UK)                                |
| Rabbit anti- $\gamma$ H2AX (9718)        | Cell Signaling Technology (Danvers, MA, USA)         |
| Goat anti-Arg1 (IMG-30305)               | NOVUS Biologicals, Bio-techne (Minneapolis, MN, USA) |
| Rabbit anti-iNOS (ab178945)              | Abcam (Cambridge, UK)                                |
| Rabbit anti-CD4 (93518)                  | Cell Signaling Technology (Danvers, MA, USA)         |
| Rabbit anti-CD8 (ab217344)               | Abcam (Cambridge, UK)                                |
| Rabbit anti-FoxP3 (ab215206)             | Abcam (Cambridge, UK)                                |
| Rabbit anti-GFAP (Z033429-2)             | Agilent Technologies LDA UK Limited                  |

**Supplementary Table 3:** Primary antibodies

#### Human primers

| Gene           | Forward                | Reverse                |
|----------------|------------------------|------------------------|
| GFP            | CACTACTTGTCCACCCAATCTG | GCAGCGGTCACAAACTCAAG   |
| Arg1           | GTTGATGTCCCTAATGACAGC  | CATTCTTCTGGACCTCTGCC   |
| NOS2           | GAGCCACAGTCCTCTTTGC    | CTCTCTTGCGGACCATCTCC   |
| Ym1            | GTACCCTGGGTCTCGAGGAA   | GCCTTGGAATGTCTTTCTCCAC |
| TNF $\alpha$   | TGCCTATGTCTCAGCCTCTTC  | GAGGCCATTTGGGA ACTTCT  |
| $\beta$ -actin | GGCTATGCTCTCCCTCACG    | CTTCTCTTTGATGTCACGCACG |

**Supplementary Table 4:** Human qPCR primer sequences
